# Supplementary material for: Electrochemical fabrication of an efficient cobalt–iron oxide/graphene heterostructure by a three-electrode system for electrocatalytic oxygen evolution reaction
Source: Royal Society of Chemistry journal article supplement (doi:10.1039/d2nj03200g), 2022-01-01
Supplement: d2nj03200g1.pdf [file d2nj03200g1.pdf]

Electrochemical fabrication of efficient cobalt-iron oxide/graphene heterostructure by a three-electrode system for electrocatalytic oxygen evolution reaction

He Xiao‡, Xiaoru Cheng‡, Yanying Jing, Man Zhao\*, Li Zhang, Haishun Wu and Jianfeng Jia\*

Key Laboratory of Magnetic Molecules & Magnetic Information Materials Ministry of Education, The School of Chemical and Material Science, Shanxi Normal University, Taiyuan, 030000, China

\*Corresponding author

E-mail: zm03030225@sxnu.edu.cn (M. Zhao); jiajf@dns.sxnu.edu.cn (J.F. Jia)

Author contributions

‡These authors made equal contribution

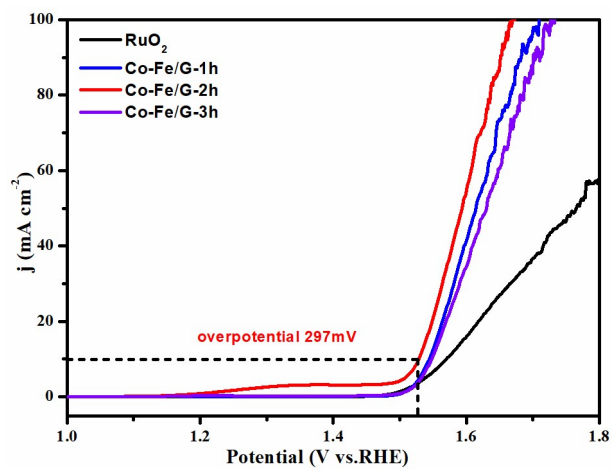

**Fig. S1** LSV curves of Co-Fe/G prepared at different electrolysis time.

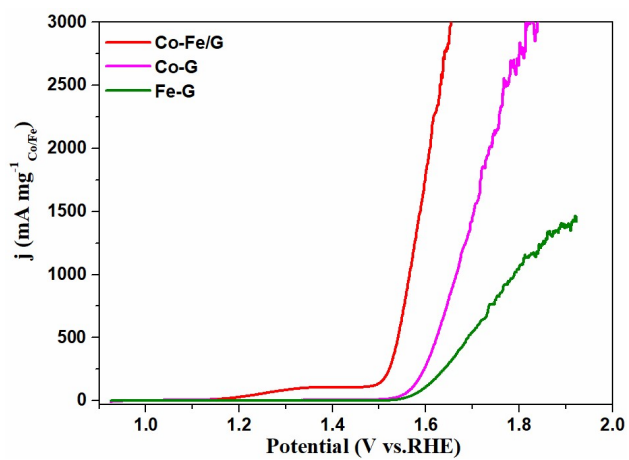

**Fig. S2** LSV (mass activity) curves of Co-Fe/G, Co/G and Fe/G.

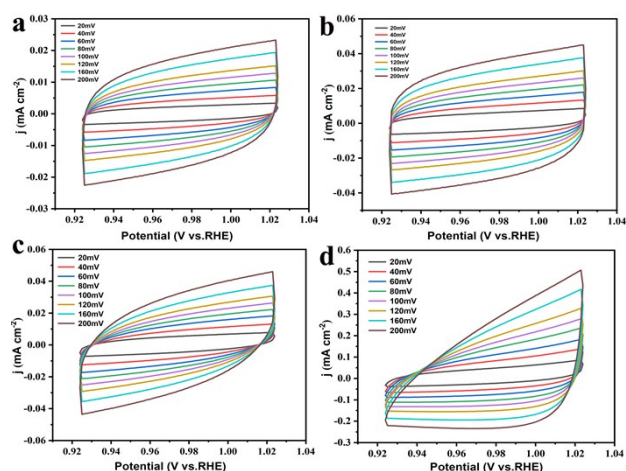

**Fig. S3** Cyclic voltammograms of (a) graphene as well as the (b) Co/G, (c) Fe/G and (d) Co-Fe/G catalysts in 1 M KOH at different scan rates.

Just as is conceived, composition synergy could also support more electrochemical active surface area (ECSA) for OER. Here, ECSAs is determined by electrochemical double-layer capacitances ( $C_{dl}$ ) measured in the non-faradaic potential. From the  $C_{DL}$ , one can easily find out the ECSA of an electrocatalyst using the following equation, in case when the specific capacitance ( $C_S$ ) of the same material is known or determined under similar experimental conditions.  $ECSA = C_{DL}/C_S$  Hence we have chosen an average of 0.040 mF to get the ECSA.

**Table S1** ECSAs of different materials

|                 | graphene | Fe/G  | Co/G  | Co-Fe/G |
|-----------------|----------|-------|-------|---------|
| $C_{dl}$ value  | 0.084    | 0.138 | 0.161 | 1.130   |
| ECSA ( $cm^2$ ) | 2.1      | 3.45  | 4.025 | 32.5    |

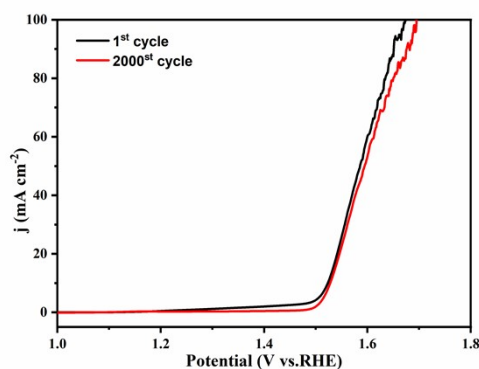

**Fig. S4** Polarization curves of the Co-Fe/G catalyst before and after 2000 cycles.

**Table S2** . The calculated TOF values of these catalysts

| Catalyst | Co (wt %)[a] | Fe (wt %)[a] | TOF( s <sup>-1</sup> ) |
|----------|--------------|--------------|------------------------|
| Co/G     | 11.34        | /            | 0.59                   |
| Fe/G     | /            | 22.68        | 0.22                   |
| Co-Fe/G  | 5.71         | 2.90         | 3.82                   |

[a] The values were determined from the ICP-OES analyses

The turnover frequency (TOF) values of all the catalysts for the OER were calculated according to the following equation.

$$\text{TOF (s}^{-1}\text{)} = j N_A / n F \Gamma \quad (\text{S1})$$

where  $j$  stands for the current density (A cm<sup>-2</sup>),  $N_A$  is the Avogadro number,  $n$  is the number of electrons transferred to evolve a molecule of product (for O<sub>2</sub>, it is 4),  $F$  is the Faraday constant (=96 485 C), and  $\Gamma$  is the surface concentration of active sites or number of participating atoms in the catalyst material. The calculated TOF values of all the catalysts are listed in the table.

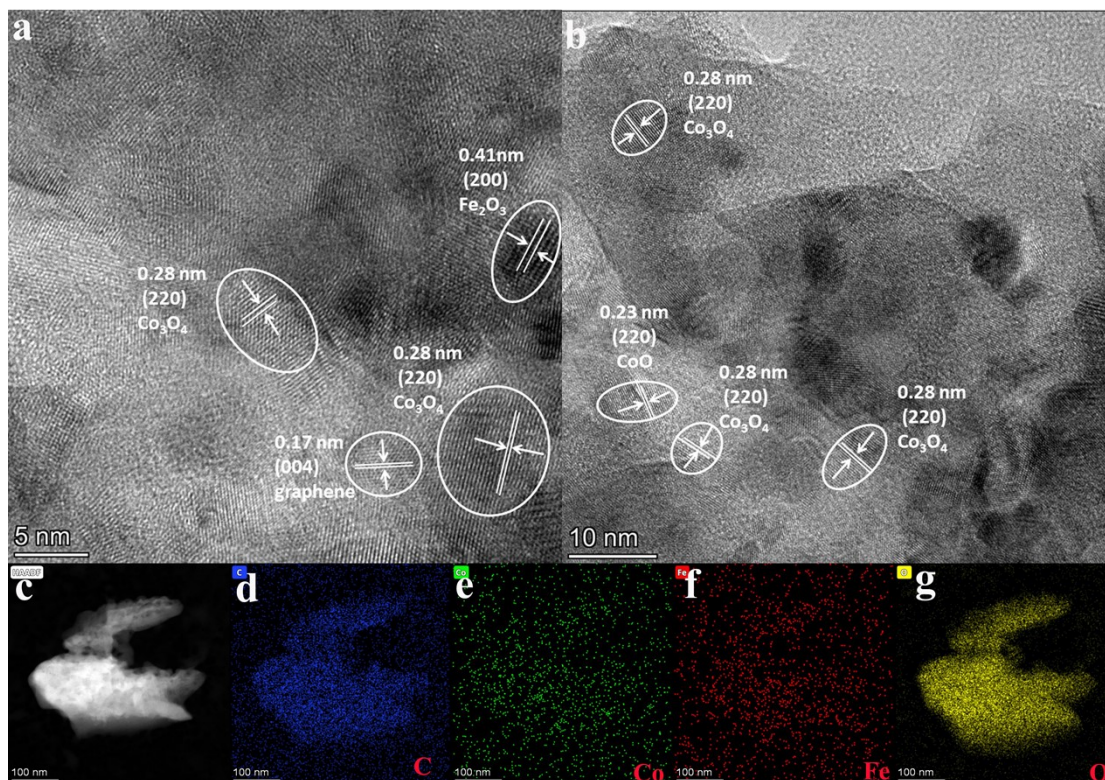

**Fig. S5** HRTEM images (a,b), HAADF-STEM image (c) and corresponding EDS mapping images (d-g) of Co-Fe/G.

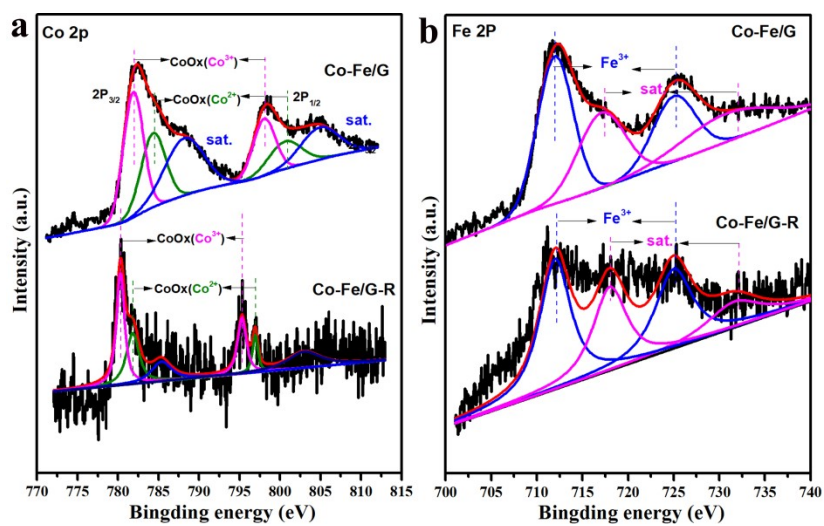

**Fig. S6** (a) Co 2p XPS spectra and (b) Fe 2p XPS spectra of Co-Fe/G and Co-Fe/G-R.
